# Supplementary material for: Transcriptional and Proteomic Analysis of the Aspergillus fumigatus ΔprtT Protease-Deficient Mutant
Source: PLoS One. 2012 Apr 13;7(4):e33604. doi: 10.1371/journal.pone.0033604 (PMC3326020; doi:10.1371/journal.pone.0033604)
Supplement: Supporting Information S1 — Genes up or down-regulated in the ΔprtT mutant strain relative to the WT. (XLSX) [file pone.0033604.s001.xlsx]

## Sheet: DownGenes
ID	Fold change
AFUA_3G03440	39.7624
AFUA_7G06060	30.4844
AFUA_3G03640	28.84
AFUA_7G04730	23.8624
AFUA_2G07680	23.1029
AFUA_4G10120	18.3792
AFUA_5G03800	16.641
AFUA_3G03420	14.9285
AFUA_3G03410	14.8941
AFUA_4G11800	14.3204
AFUA_5G02700	11.1579
AFUA_3G03430	11.0553
AFUA_8G02750	10.459
AFUA_3G03400	9.23215
AFUA_1G17270	8.26301
AFUA_1G17180	7.67411
AFUA_4G14250	7.37853
AFUA_8G02760	7.07796
AFUA_8G04380	6.54322
AFUA_2G00320	6.49802
AFUA_3G08110	6.21893
AFUA_2G03730	5.85634
AFUA_6G13800	5.6962
AFUA_8G01690	5.59188
AFUA_3G03670	5.5661
AFUA_3G09690	5.52765
AFUA_4G14230	5.4768
AFUA_1G03350	5.20537
AFUA_4G14320	5.06303
AFUA_3G03390	4.95883
AFUA_2G05720	4.78991
AFUA_2G04200	4.63746
AFUA_2G04890	4.51064
AFUA_1G03360	4.46915
AFUA_3G02430	4.39745
AFUA_3G14920	4.31691
AFUA_2G04220	4.22807
AFUA_1G03150	4.18918
AFUA_4G06890	4.17951
AFUA_3G02520	4.1315
AFUA_5G14680	4.01853
AFUA_6G07720	4.00925
AFUA_1G00760	3.85483
AFUA_3G03260	3.83706
AFUA_5G03930	3.80176
AFUA_1G14930	3.79298
AFUA_1G03610	3.74076
AFUA_5G03920	3.72352
AFUA_6G02800	3.6978
AFUA_5G07780	3.65533
AFUA_6G13790	3.64689
AFUA_3G14930	3.64689
AFUA_7G02010	3.605
AFUA_1G17190	3.5801
AFUA_6G00310	3.57184
AFUA_8G02440	3.56359
AFUA_4G09360	3.56359
AFUA_6G07770	3.4822
AFUA_2G08280	3.46615
AFUA_2G05730	3.46615
AFUA_6G08760	3.45017
AFUA_3G03050	3.40267
AFUA_4G14240	3.40267
AFUA_4G13630	3.33264
AFUA_5G04260	3.29436
AFUA_2G04230	3.29436
AFUA_4G06620	3.28676
AFUA_3G03650	3.28676
AFUA_1G07480	3.27918
AFUA_4G08710	3.21912
AFUA_7G06780	3.19688
AFUA_1G03340	3.18215
AFUA_4G09350	3.16017
AFUA_8G05600	3.11666
AFUA_5G04250	3.09513
AFUA_2G07670	3.06666
AFUA_6G08750	3.04547
AFUA_2G13460	3.03845
AFUA_5G10660	3.01049
AFUA_8G05140	2.95536
AFUA_5G01010	2.94854
AFUA_5G07590	2.94173
AFUA_2G02310	2.91467
AFUA_6G05140	2.90123
AFUA_2G01890	2.90123
AFUA_1G12350	2.88786
AFUA_5G01280	2.86791
AFUA_7G00740	2.85469
AFUA_4G10610	2.84153
AFUA_2G04260	2.82843
AFUA_4G13380	2.8219
AFUA_4G09800	2.8219
AFUA_7G08360	2.80241
AFUA_3G11070	2.77022
AFUA_2G09610	2.75745
AFUA_4G09810	2.75108
AFUA_3G14030	2.7384
AFUA_2G05060	2.7384
AFUA_7G04760	2.73208
AFUA_3G03580	2.71321
AFUA_2G17810	2.70695
AFUA_1G12690	2.70695
AFUA_3G01900	2.69447
AFUA_3G06000	2.68204
AFUA_2G04250	2.67586
AFUA_6G08470	2.66352
AFUA_7G08330	2.62685
AFUA_6G14200	2.6087
AFUA_2G03020	2.6087
AFUA_3G14440	2.57874
AFUA_6G13810	2.57279
AFUA_3G06190	2.56093
AFUA_3G01580	2.55502
AFUA_3G14540	2.54912
AFUA_8G07090	2.54324
AFUA_2G10690	2.53151
AFUA_7G04930	2.51403
AFUA_2G03010	2.45661
AFUA_2G05810	2.45661
AFUA_2G09350	2.42839
AFUA_1G13750	2.41162
AFUA_8G04620	2.41162
AFUA_3G07310	2.40605
AFUA_5G10650	2.37293
AFUA_2G00180	2.37293
AFUA_7G05070	2.37293
AFUA_6G02810	2.36745
AFUA_1G15820	2.35653
AFUA_1G10390	2.35653
AFUA_5G14890	2.34567
AFUA_1G03200	2.33486
AFUA_4G09580	2.32409
AFUA_6G00340	2.32409
AFUA_7G03740	2.31873
AFUA_3G00440	2.30271
AFUA_6G03400	2.2974
AFUA_3G08990	2.2974
AFUA_3G14590	2.29209
AFUA_3G03570	2.27626
AFUA_6G07010	2.24492
AFUA_6G07200	2.24492
AFUA_2G16570	2.24492
AFUA_2G17330	2.23457
AFUA_2G05690	2.22942
AFUA_2G13140	2.21914
AFUA_3G06460	2.20891
AFUA_1G05170	2.19872
AFUA_1G17200	2.19365
AFUA_4G11310	2.18354
AFUA_5G13710	2.1785
AFUA_5G10560	2.17347
AFUA_3G02550	2.15348
AFUA_8G04630	2.15348
AFUA_4G10410	2.14851
AFUA_3G03450	2.14851
AFUA_3G00820	2.14355
AFUA_4G13050	2.1386
AFUA_1G17170	2.1386
AFUA_6G09100	2.13366
AFUA_4G14060	2.12874
AFUA_1G16850	2.12383
AFUA_3G03290	2.11893
AFUA_6G10450	2.11893
AFUA_3G00650	2.11893
AFUA_1G16030	2.11404
AFUA_6G08440	2.10429
AFUA_8G04310	2.09943
AFUA_1G16350	2.09943
AFUA_3G01590	2.09459
AFUA_4G06940	2.09459
AFUA_1G12840	2.08975
AFUA_1G14340	2.08493
AFUA_5G10940	2.08493
AFUA_2G09330	2.08493
AFUA_7G00660	2.08012
AFUA_6G10080	2.06098
AFUA_5G11190	2.06098
AFUA_6G03050	2.05623
AFUA_8G07080	2.05148
AFUA_3G03280	2.05148
AFUA_1G04750	2.05148
AFUA_3G06020	2.04675
AFUA_8G02190	2.04202
AFUA_6G04920	2.03731
AFUA_6G13380	2.03261
AFUA_1G10350	2.02324
AFUA_7G00340	2.00926
AFUA_4G12930	2.00926
AFUA_7G00650	2.00926
AFUA_2G11520	2.00463
AFUA_2G13010	2.00463
AFUA_4G07060	2.00463
AFUA_6G01950	2.00463
AFUA_4G07150	2
AFUA_1G15140	2
AFUA_7G02420	2
AFUA_3G11430	2
AFUA_3G03750	2

## Sheet: UpReg
ID	Fold change
AFUA_2G00540	40.7859
AFUA_3G12900	32.2971
AFUA_8G00480	30.0647
AFUA_8G00540	29.1751
AFUA_8G00560	28.9736
AFUA_8G00550	28.1813
AFUA_8G00390	26.5996
AFUA_8G00580	25.0487
AFUA_1G16250	22.9433
AFUA_8G00430	22.0596
AFUA_8G00370	21.3574
AFUA_8G00400	20.3459
AFUA_8G00520	20.1587
AFUA_1G17250	19.1154
AFUA_8G00800	18.3368
AFUA_3G08250	17.188
AFUA_8G00940	15.455
AFUA_8G00570	13.2998
AFUA_7G06380	13.147
AFUA_8G00440	12.5244
AFUA_3G12890	10.0794
AFUA_8G00490	10.0329
AFUA_4G14770	9.78112
AFUA_5G08180	9.69114
AFUA_8G00530	9.60199
AFUA_6G11850	9.4917
AFUA_4G06880	9.12611
AFUA_8G00500	8.49531
AFUA_4G14780	8.14925
AFUA_8G00420	7.78124
AFUA_5G13180	7.56846
AFUA_8G05800	7.53357
AFUA_5G08900	7.22668
AFUA_2G09860	7.19336
AFUA_1G14800	6.9644
AFUA_4G14800	6.9323
AFUA_2G00530	6.86852
AFUA_2G00960	6.39377
AFUA_3G12960	6.27667
AFUA_1G04150	6.24774
AFUA_3G00800	6.11916
AFUA_2G00520	5.9656
AFUA_6G13960	5.74909
AFUA_3G03820	5.73582
AFUA_2G02020	5.42642
AFUA_8G06560	5.4014
AFUA_4G14530	5.31474
AFUA_5G13160	5.18137
AFUA_6G03060	5.14558
AFUA_8G00510	5.14558
AFUA_2G14480	5.05134
AFUA_2G08350	5.03968
AFUA_4G14790	5.02805
AFUA_5G10490	4.74585
AFUA_6G11840	4.68051
AFUA_6G12070	4.63746
AFUA_2G17540	4.61608
AFUA_6G06530	4.36707
AFUA_4G14820	4.31691
AFUA_6G13980	4.30695
AFUA_1G12240	4.23785
AFUA_8G04290	4.22807
AFUA_6G11430	4.20858
AFUA_4G14840	4.17951
AFUA_4G00670	4.15064
AFUA_4G01230	4.05584
AFUA_5G02770	4.04648
AFUA_5G02670	4.01853
AFUA_6G13940	3.88164
AFUA_6G13920	3.84593
AFUA_3G02640	3.73213
AFUA_6G03440	3.68075
AFUA_3G13080	3.605
AFUA_5G14290	3.56359
AFUA_6G13970	3.56359
AFUA_4G05900	3.53898
AFUA_4G01290	3.53081
AFUA_4G14830	3.52266
AFUA_1G12850	3.49026
AFUA_3G11790	3.4822
AFUA_7G01000	3.44221
AFUA_8G00470	3.43426
AFUA_2G14750	3.43426
AFUA_4G14850	3.41843
AFUA_1G02770	3.36359
AFUA_8G00380	3.35582
AFUA_5G02640	3.34808
AFUA_3G12930	3.34035
AFUA_3G09800	3.30962
AFUA_4G10140	3.28676
AFUA_3G12920	3.27161
AFUA_6G05030	3.24151
AFUA_2G10560	3.21912
AFUA_4G01250	3.18215
AFUA_5G12460	3.12387
AFUA_1G15180	3.10229
AFUA_6G11660	3.08799
AFUA_5G11020	3.03845
AFUA_5G01920	3.02444
AFUA_4G14810	3.01746
AFUA_6G14480	2.9897
AFUA_3G08040	2.9828
AFUA_6G01840	2.96905
AFUA_3G12910	2.95536
AFUA_6G09200	2.95536
AFUA_1G00450	2.94854
AFUA_1G10580	2.93494
AFUA_5G11600	2.91467
AFUA_5G06230	2.86791
AFUA_4G08120	2.83497
AFUA_6G07260	2.8219
AFUA_4G01270	2.8219
AFUA_8G06410	2.80889
AFUA_6G07900	2.80241
AFUA_6G12180	2.80241
AFUA_4G07790	2.79594
AFUA_7G06140	2.78949
AFUA_4G00800	2.77663
AFUA_8G07210	2.77663
AFUA_5G02780	2.74473
AFUA_8G01540	2.74473
AFUA_8G02720	2.7384
AFUA_1G12920	2.72578
AFUA_8G05530	2.71321
AFUA_5G01420	2.7007
AFUA_5G13570	2.68825
AFUA_3G08210	2.68204
AFUA_6G03870	2.67586
AFUA_5G07980	2.65737
AFUA_5G12470	2.65737
AFUA_1G17470	2.64512
AFUA_5G13170	2.64512
AFUA_2G17490	2.63902
AFUA_2G07750	2.62685
AFUA_2G17580	2.60268
AFUA_1G00440	2.56685
AFUA_3G12220	2.55502
AFUA_2G16940	2.55502
AFUA_3G12790	2.54324
AFUA_8G04110	2.51403
AFUA_5G12510	2.49666
AFUA_8G00360	2.48515
AFUA_3G09270	2.47369
AFUA_1G11380	2.46798
AFUA_6G11110	2.45661
AFUA_3G08030	2.45094
AFUA_4G01160	2.44528
AFUA_4G11730	2.42279
AFUA_4G07810	2.42279
AFUA_5G02620	2.41719
AFUA_1G03180	2.41162
AFUA_1G00480	2.40605
AFUA_3G01100	2.4005
AFUA_2G16200	2.39496
AFUA_1G14080	2.38392
AFUA_5G01590	2.38392
AFUA_3G11170	2.37841
AFUA_4G09110	2.34567
AFUA_6G12670	2.34567
AFUA_3G13010	2.32947
AFUA_7G06640	2.32409
AFUA_4G11720	2.32409
AFUA_4G08600	2.32409
AFUA_2G02040	2.31873
AFUA_4G11220	2.31338
AFUA_6G07430	2.31338
AFUA_2G02990	2.30804
AFUA_5G02990	2.29209
AFUA_6G02050	2.28153
AFUA_6G10050	2.27626
AFUA_2G14360	2.27101
AFUA_5G02040	2.26577
AFUA_7G06630	2.24492
AFUA_3G11930	2.23457
AFUA_6G08920	2.21914
AFUA_1G01920	2.21402
AFUA_2G09510	2.19872
AFUA_5G06780	2.19365
AFUA_6G13190	2.19365
AFUA_1G05680	2.16845
AFUA_3G08920	2.16845
AFUA_8G00280	2.16845
AFUA_1G16590	2.15846
AFUA_8G00460	2.15348
AFUA_1G04870	2.14851
AFUA_8G00410	2.14851
AFUA_1G02850	2.14355
AFUA_6G00430	2.13366
AFUA_2G04170	2.13366
AFUA_5G07000	2.12874
AFUA_2G12780	2.12874
AFUA_6G11160	2.12874
AFUA_3G02280	2.12874
AFUA_8G04070	2.12874
AFUA_5G01490	2.12383
AFUA_2G05870	2.11893
AFUA_2G02250	2.11893
AFUA_4G12590	2.11404
AFUA_8G04560	2.11404
AFUA_4G08990	2.10916
AFUA_2G01220	2.10429
AFUA_7G01690	2.10429
AFUA_8G06440	2.09943
AFUA_6G13630	2.09943
AFUA_3G03700	2.09459
AFUA_6G03200	2.09459
AFUA_8G06030	2.08975
AFUA_7G01340	2.08493
AFUA_3G00630	2.08493
AFUA_6G10650	2.08012
AFUA_3G08050	2.08012
AFUA_3G08960	2.07532
AFUA_1G17070	2.06098
AFUA_2G08340	2.06098
AFUA_6G01930	2.06098
AFUA_5G11690	2.05623
AFUA_5G03350	2.05148
AFUA_6G07750	2.04675
AFUA_3G02220	2.04202
AFUA_3G01350	2.02324
AFUA_5G06070	2.02324
AFUA_7G02510	2.02324
AFUA_3G08910	2.02324
AFUA_3G07030	2.00926
AFUA_3G05870	2.00926
AFUA_5G08810	2.00463
AFUA_5G12840	2
AFUA_1G16880	2
AFUA_4G10110	2
